# Supplementary material for: Influence of strontium ions incorporated into nanosheet-pore topographical titanium substrates on osteogenic differentiation of mesenchymal stem cells in vitro and on osseointegration in vivo
Source: Royal Society of Chemistry journal article supplement (doi:10.1039/c6tb00724d), 2016-01-01
Supplement: c6tb00724d1.pdf [file c6tb00724d1.pdf]

## Supporting Information

### **Influence of strontium ions incorporated nanosheet-pore topographical titanium substrates on osteogenic differentiation of mesenchymal stem cells *in vitro* and osseointegration *in vivo***

Kui Xu, Weizhen Chen, Yan Hu, Xinkun Shen, Gaoqiang Xu, Qichun Ran, Yonglin Yu,  
Caiyun Mu, Kaiyong Cai\*

Key Laboratory of Biorheological Science and Technology, Ministry of Education  
College of Bioengineering, Chongqing University, Chongqing 400044, P. R. China

\*Corresponding author: Prof. Kaiyong Cai

College of Bioengineering

Chongqing University

Chongqing 400044

P. R. China

Tel: +86-23-65102507

Fax: +86-23-65102877

E-mail: [kaiyong\\_cai@cqu.edu.cn](mailto:kaiyong_cai@cqu.edu.cn)

## ***List of Contents***

|                                                                                            |     |
|--------------------------------------------------------------------------------------------|-----|
| <b>Figure S1.</b> Illustration of the sample fabrication process.....                      | S3  |
| <b>Figure S2.</b> Surgical procedure.....                                                  | S4  |
| <b>Figure S3.</b> Push-out test.....                                                       | S5  |
| <b>Figure S4.</b> Surface average roughness of different Ti substrates.....                | S6  |
| <b>Figure S5.</b> High-resolution XPS spectra of different Ti substrates.....              | S7  |
| <b>Figure S6.</b> Release profiles of Sr <sup>2+</sup> at different time points.....       | S8  |
| <b>Figure S7.</b> SEM images of MSCs cultured onto different samples.....                  | S9  |
| <b>Figure S8.</b> Fluorescence images of MSCs grown onto different samples.....            | S10 |
| <b>Figure S9.</b> ALP staining of MSCs cultured onto TCPS and different Ti substrates..... | S11 |
| <b>Figure S10.</b> Optical images of ECM mineralization of MSCs on different samples.....  | S12 |
| <b>Figure S11.</b> Representative X-ray photographs of different implants.....             | S13 |
| <b>Figure S12.</b> Micro-CT analysis of trabecular thickness.....                          | S14 |

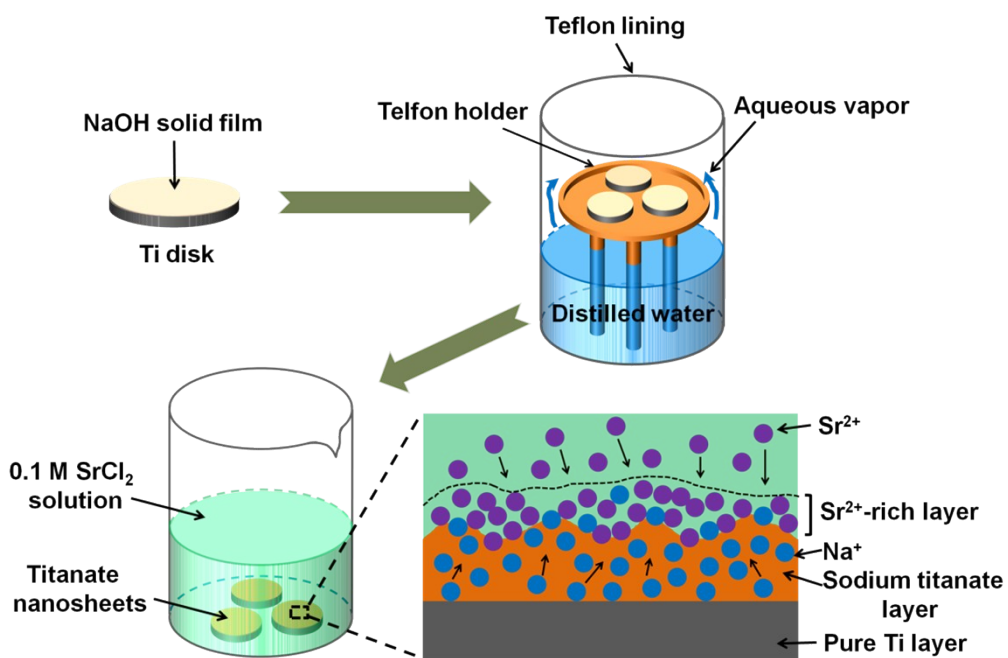

**Figure S1.** Illustration of the sample fabrication process.

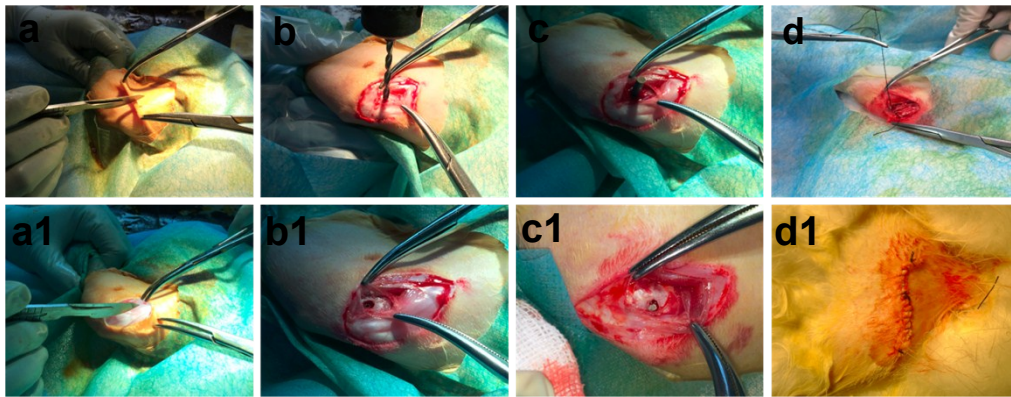

**Figure S2.** Surgical procedure: (a & a1) the upper legs of rabbits were shaved and disinfected with iodophor, then the femurs were exposed and periosteum was separated; (b & b1) a hole was made on the planar surface of femur with a tryphine drill; (c & c1) a prepared implant was gently inserted into the hole, and the end of samples should keep parallel with bone surface; (d & d1) wound bed was closed in layers with sutures and disinfection treatment was performed.

**A**

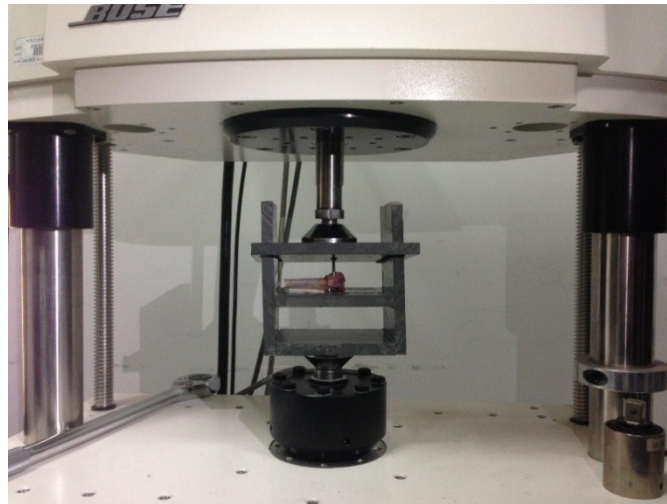

**B**

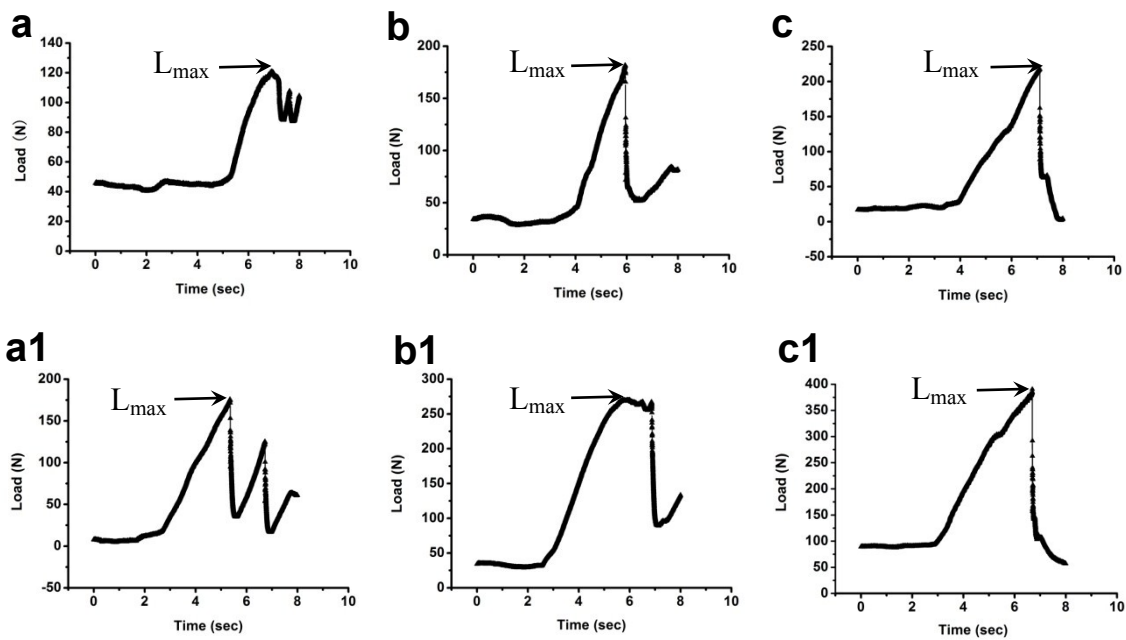

**Figure S3.** (A) The photo of instrument for push-out test; (B) The Representative push-out load -time curve of pure Ti (a & a1), TNSs (b & b1) and Sr120-TNSs (c & c1) implants after implantation for 4 (a, b & c) and 12 (a1, b1 & c1) weeks. The samples

were pushed out along the long axis at a loading rate of 5 mm/min.  $L_{\max}$  (N) was the maximum push-out load.

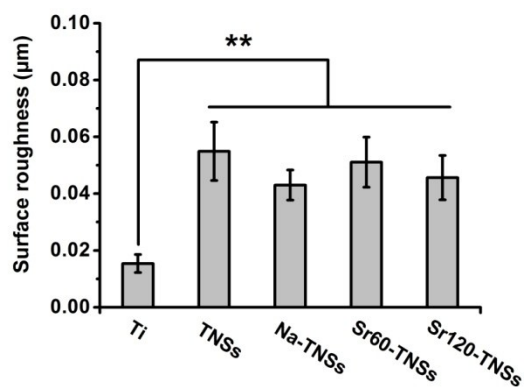

**Figure S4.** Surface average roughness (Ra) of Ti, TNSs, Na-TNSs, Sr60-TNSs and Sr120-TNSs substrates. Error bars represent means  $\pm$  SD for n=6, \*\*p<0.01.

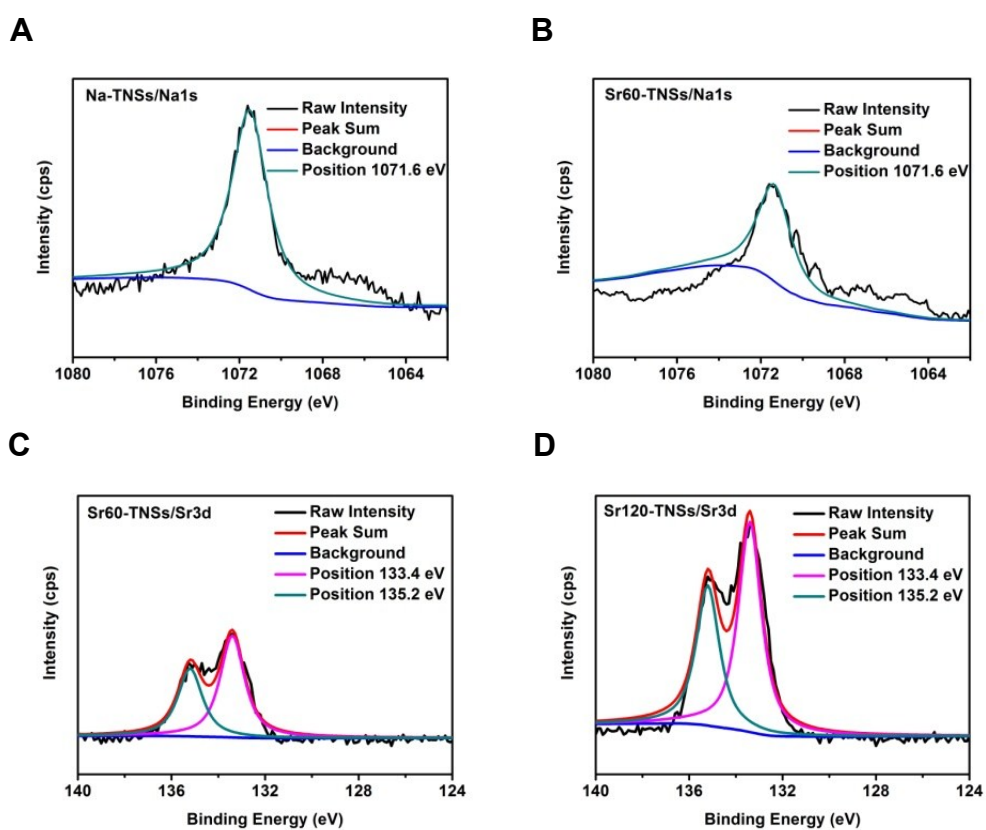

**Figure S5.** High-resolution XPS spectra of Na1s and Sr3d detected from Na<sup>+</sup>-incorporating and/or Sr<sup>2+</sup>-incorporating titanium surfaces: (A) Na1s of Na-TNSs substrates. (B) Na1s of Sr60-TNSs substrates. (C) Sr3d of Sr60-TNSs substrates. (D) Sr3d of Sr120-TNSs substrates.

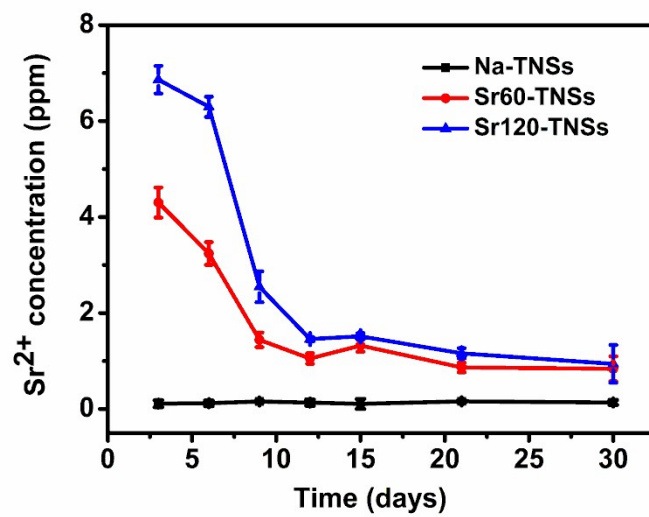

**Figure S6.** Release profiles of Sr<sup>2+</sup> from Na-TNSs, Sr60-TNSs, and Sr120-TNSs substrates at different time points after immersion into SBF solution for 30 days.



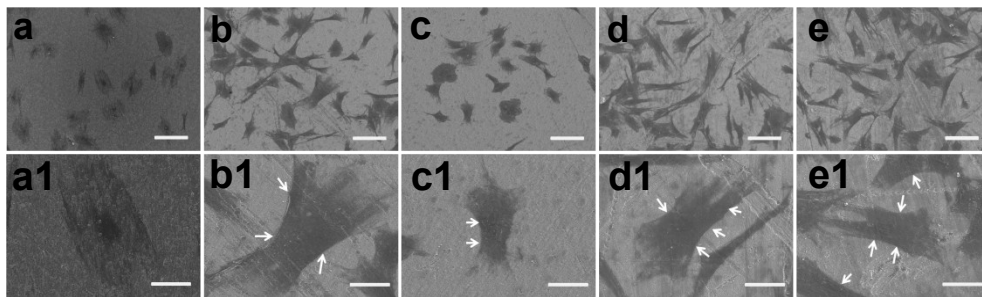

**Figure S7.** Representative SEM images of MSCs cultured onto different Ti substrates: Ti (a & a1), TNSs (b & b1), Na-TNSs (c & c1), Sr60-TNSs (d & d1), Sr120-TNSs (e & e1) (scale bar: 100  $\mu\text{m}$  for a, b, c, d and e, 30  $\mu\text{m}$  for a1, b1, c1, d1 and e1).

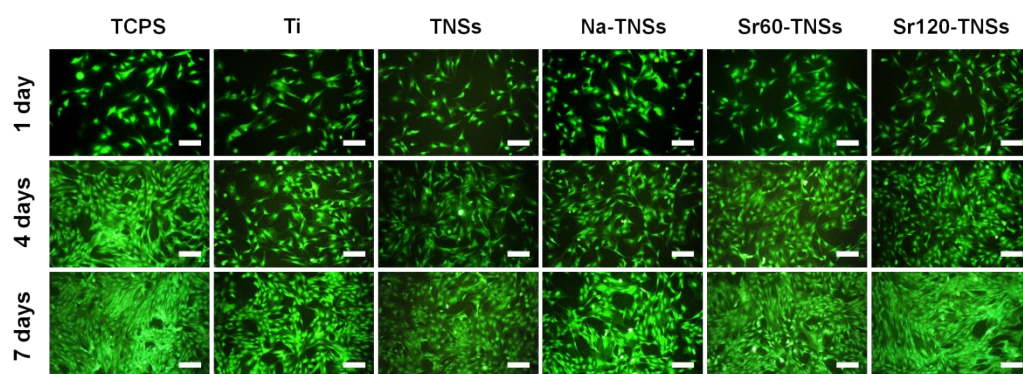

**Figure S8.** Representative fluorescence microscopy images of MSCs grown onto these five kinds of different samples and TCPS, which was observed by a stereoscopic microscope (MVX10, Olympus) after staining with fluorescein diacetate (FDA) (scale bar, 200  $\mu\text{m}$ ).

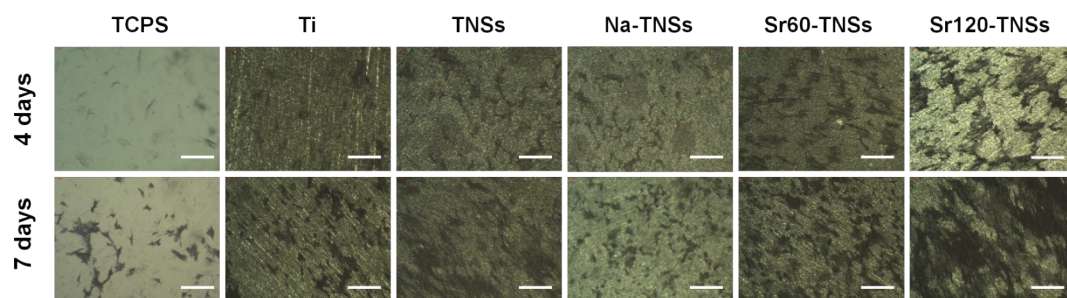

**Figure S9.** Representative ALP staining of MSCs cultured onto TCPS and different Ti substrates after incubation for 4 and 7 days (scale bar: 1 mm).

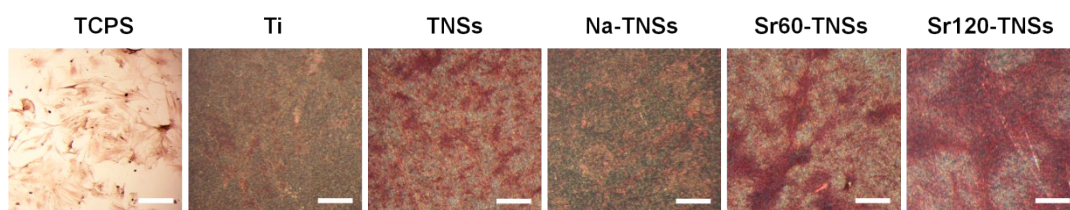

**Figure S10.** Representative optical images of ECM mineralization of MSCs adhered to different Ti substrates and TCPS for 3 weeks (scale bar: 1 mm).

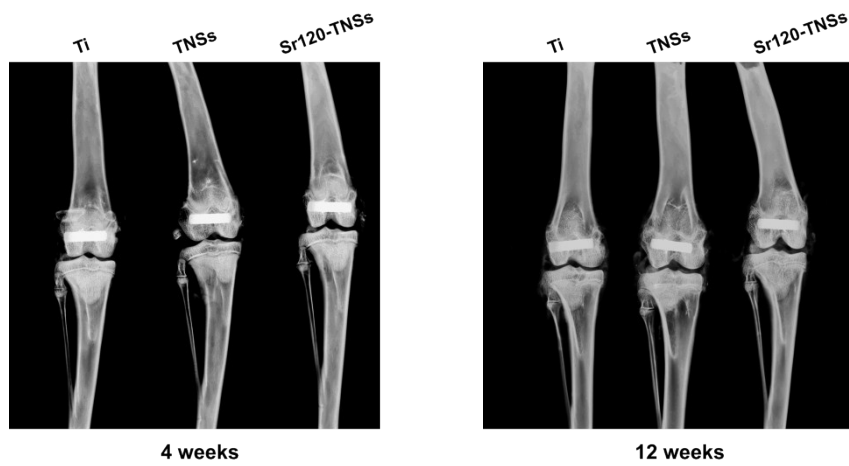

**Figure S11.** Representative X-ray photographs of Ti, TNSs and Sr120-TNSs after implantation for 4 and 12 weeks.

**A**

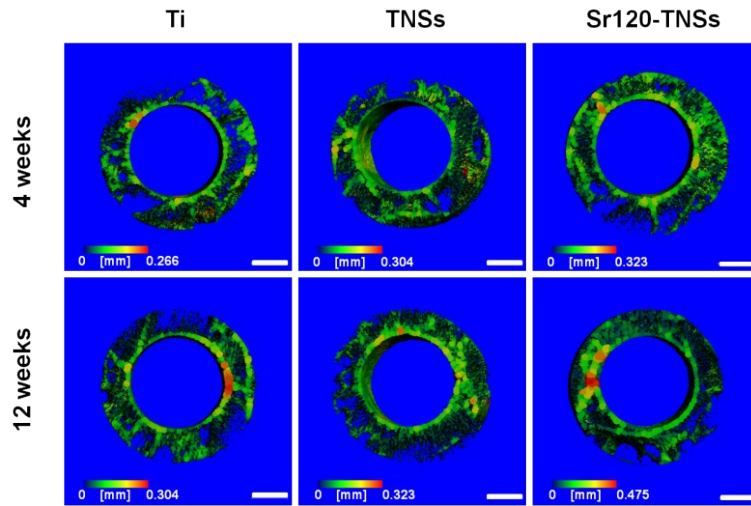

**B**

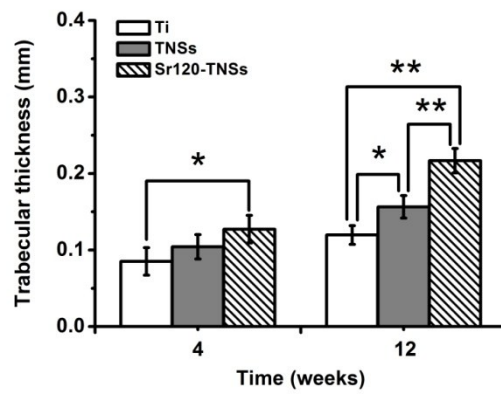

**Figure S12.** (A) Trabecular thickness of Ti, TNSs and Sr120-TNSs after implantation for 4 and 12 weeks (scale bar, 1 mm). (B) Quantitative analysis of the newly formed bone was performed for trabecular thickness. The above data were obtained according to the Micro-CT analysis. Error bars represent means  $\pm$  SD for n=4, \*p<0.05,

\*\*p<0.01.
